# Supplementary material
Source: PubMed Central journal article supplement (PMC2948856)
Supplement: NIHMS234247-supplement-Supplementary_Figure_S1-S7___Table_S1-S4.pdf [file NIHMS234247-supplement-Supplementary_Figure_S1-S7___Table_S1-S4.pdf]

## SUPPORTING INFORMATION

### A New Pathway for $\alpha$ -Ribazole-Phosphate Synthesis in *Listeria innocua*.

Michael J. Gray and Jorge C. Escalante-Semerena\*

\*Corresponding author: Department of Bacteriology, University of Wisconsin, 6478 Microbial Sciences Building, 1550 Linden Drive, Madison, WI 53706. Tel: 608-262-7379; Fax: 608-265-7909; Email: [escalante@bact.wisc.edu](mailto:escalante@bact.wisc.edu)

#### TABLES

**Table S1. Strains and plasmids used in this study**

| Strain or plasmid                  | Marker(s) <sup>a</sup>          | Relevant genotype                                                                                                                                                                        | Reference or source <sup>b</sup>                     |
|------------------------------------|---------------------------------|------------------------------------------------------------------------------------------------------------------------------------------------------------------------------------------|------------------------------------------------------|
| <u><i>L. innocua</i> strain:</u>   |                                 |                                                                                                                                                                                          |                                                      |
| DD680                              |                                 |                                                                                                                                                                                          | K. Boor <sup>c</sup>                                 |
| <u><i>S. enterica</i> strains:</u> |                                 |                                                                                                                                                                                          |                                                      |
| TR6583                             |                                 | <i>metE205 ara-9</i> derivative of strain LT2                                                                                                                                            | K. Sanderson <sup>d</sup> via J.R. Roth <sup>e</sup> |
| JE1244                             | Tc <sup>R</sup>                 | <i>metE205 ara-9 cobT10::Tn10d(tet<sup>+</sup>)</i>                                                                                                                                      | lab collection                                       |
| JE2701                             | Tc <sup>R</sup>                 | <i>metE205 ara-9 DELcob291 cobB1176::Tn10d(tet<sup>+</sup>)</i>                                                                                                                          | lab collection                                       |
| JE8511                             | Tc <sup>R</sup> Ap <sup>R</sup> | <i>metE205 ara-9 cobT10::Tn10d(tet<sup>+</sup>)</i> / pBAD24                                                                                                                             |                                                      |
| JE8612                             | Tc <sup>R</sup> Ap <sup>R</sup> | <i>metE205 ara-9 cobT10::Tn10d(tet<sup>+</sup>)</i> / pCOBT48                                                                                                                            |                                                      |
| JE12331                            | Tc <sup>R</sup> Ap <sup>R</sup> | <i>metE205 ara-9 DELcob291 cobB1176::Tn10d(tet<sup>+</sup>)</i> / pBAD24                                                                                                                 |                                                      |
| JE12332                            | Tc <sup>R</sup> Ap <sup>R</sup> | <i>metE205 ara-9 DELcob291 cobB1176::Tn10d(tet<sup>+</sup>)</i> / pCOBT48                                                                                                                |                                                      |
| JE12334                            | Tc <sup>R</sup> Ap <sup>R</sup> | <i>metE205 ara-9 DELcob291 cobB1176::Tn10d(tet<sup>+</sup>)</i> / pCBLTS1                                                                                                                |                                                      |
| JE12550                            | Tc <sup>R</sup> Ap <sup>R</sup> | <i>metE205 ara-9 cobT10::Tn10d(tet<sup>+</sup>)</i> / pCBLT1                                                                                                                             |                                                      |
| JE12552                            | Tc <sup>R</sup> Ap <sup>R</sup> | <i>metE205 ara-9 cobT10::Tn10d(tet<sup>+</sup>)</i> / pCBLTS1                                                                                                                            |                                                      |
| JE12588                            | Tc <sup>R</sup> Ap <sup>R</sup> | <i>metE205 ara-9 cobT10::Tn10d(tet<sup>+</sup>)</i> / pCBLS4                                                                                                                             |                                                      |
| <u><i>E. coli</i> strains:</u>     |                                 |                                                                                                                                                                                          |                                                      |
| DH5 $\alpha$ /F'                   |                                 | F' / <i>endA1 hsdR17</i> (r <sub>k</sub> <sup>-</sup> m <sub>k</sub> <sup>+</sup> ) <i>glnV44 thi-1 recA1 gyrA</i> (Nal <sup>R</sup> ) <i>relA1</i> $\Delta$ ( <i>lacIZYA-argF</i> )U169 | (Woodcock et al., 1989, Raleigh et al., 1989)        |

|                           |                 |                                                                                                                                                                             |                               |
|---------------------------|-----------------|-----------------------------------------------------------------------------------------------------------------------------------------------------------------------------|-------------------------------|
|                           |                 | <i>deoR</i> ( $\phi$ 80 <i>dlac</i> $\Delta$ ( <i>lacZ</i> )M15)                                                                                                            |                               |
| BL21(DE3)                 |                 | F <sup>-</sup> <i>ompT gal dcm lon hsdSB</i> ( <i>r<sub>B</sub><sup>-</sup> m<sub>B</sub><sup>-</sup></i> ) $\lambda$ (DE3 [ <i>lacI lacUV5-T7 gene 1 ind1 sam7 nin5</i> ]) | Novagen                       |
|                           |                 |                                                                                                                                                                             |                               |
| Plasmids:                 |                 |                                                                                                                                                                             |                               |
| pGEM <sup>®</sup> -T Easy | Ap <sup>R</sup> | TA cloning vector                                                                                                                                                           | Promega                       |
| pBAD24                    | Ap <sup>R</sup> | cloning vector with P <sub>BAD</sub> arabinose-inducible promoter                                                                                                           | (Guzman <i>et al.</i> , 1995) |
| pTEV5                     | Ap <sup>R</sup> | TEV protease-cleavable His <sub>6</sub> tag overexpression vector                                                                                                           | (Rocco <i>et al.</i> , 2008)  |
| pKLD116                   | Ap <sup>R</sup> | TEV protease-cleavable His <sub>6</sub> / maltose-binding protein tag overexpression vector                                                                                 | (Rocco <i>et al.</i> , 2008)  |
| pCOBT48                   | Ap <sup>R</sup> | <i>S. enterica cobT</i> <sup>+</sup>                                                                                                                                        | lab collection                |
| pCBLT1                    | Ap <sup>R</sup> | <i>L. innocua cbIT</i> <sup>+</sup>                                                                                                                                         |                               |
| pCBLS3                    | Ap <sup>R</sup> | <i>L. innocua cbIS</i> <sup>+</sup> translational fusion to His <sub>6</sub> / maltose-binding protein tags for protein purification                                        |                               |
| pCBLS4                    | Ap <sup>R</sup> | <i>L. innocua cbIS</i> <sup>+</sup>                                                                                                                                         |                               |
| pCBLS5                    | Ap <sup>R</sup> | <i>L. innocua cbIS</i> <sup>+</sup> translational fusion to His <sub>6</sub> tag for protein purification                                                                   |                               |
| pCBLTS1                   | Ap <sup>R</sup> | <i>L. innocua cbIT</i> <sup>+</sup> <i>cbIS</i> <sup>+</sup>                                                                                                                |                               |

<sup>a</sup> Tc<sup>R</sup>, tetracycline resistance; Ap<sup>R</sup>, ampicillin resistance.

<sup>b</sup> Unless otherwise indicated, all strains and plasmids were constructed during the course of these studies.

<sup>c</sup> Department of Food Science, Cornell University

<sup>d</sup> Department of Biological Sciences, The University of Calgary, Canada

<sup>e</sup> Section of Microbiology, College of Biological Sciences, University of California-Davis

**Table S2. Composition of MLM (minimal *Listeria* medium)**

| <b>Component</b>                                                   | <b>Concentration (mM)</b>                |
|--------------------------------------------------------------------|------------------------------------------|
| fructose                                                           | 100                                      |
| 4-(2-hydroxyethyl)-1-piperazineethanesulfonic acid (HEPES, pH 7.0) | 20                                       |
| MgSO <sub>4</sub>                                                  | 2                                        |
| adenine HCl                                                        | 0.5                                      |
| CaCl <sub>2</sub>                                                  | 0.1                                      |
|                                                                    | <b>Concentration (g l<sup>-1</sup>)</b>  |
| Na <sub>2</sub> HPO <sub>4</sub> •7H <sub>2</sub> O                | 6.8                                      |
| KH <sub>2</sub> PO <sub>4</sub>                                    | 3                                        |
| NaCl                                                               | 0.5                                      |
|                                                                    | <b>Concentration (mg l<sup>-1</sup>)</b> |
| cysteine                                                           | 10                                       |
| leucine                                                            | 10                                       |
| isoleucine                                                         | 10                                       |
| valine                                                             | 10                                       |
| riboflavin                                                         | 5                                        |
| thiamine                                                           | 1                                        |
| nicotinamide                                                       | 1                                        |
| pyridoxal                                                          | 1                                        |
| <i>p</i> -aminobenzoic acid                                        | 1                                        |
| biotin                                                             | 0.5                                      |
| FeCl <sub>2</sub>                                                  | 0.135                                    |
| ZnCl <sub>2</sub>                                                  | 0.017                                    |
| MnCl <sub>2</sub> •4H <sub>2</sub> O                               | 0.01                                     |
| CoCl <sub>2</sub> •6H <sub>2</sub> O                               | 0.006                                    |
| NaMoO <sub>4</sub> •2H <sub>2</sub> O                              | 0.006                                    |
| $\alpha$ -lipoic acid                                              | 0.005                                    |
| CuCl <sub>2</sub> •2H <sub>2</sub> O                               | 0.005                                    |
| Na <sub>2</sub> SeO <sub>4</sub>                                   | 0.005                                    |

**Table S3. Comparison of the presence of *cobT*, *bluB*, and *cbiZ* homologs in bacterial genomes encoding *cbIS* or *cbIT* homologs**

| Species <sup>a</sup>                             | Locus tag of predicted <i>cbIT</i> homolog (% identity, % similarity to CbiT from <i>L. innocua</i> ) <sup>b</sup> | Locus tag of predicted <i>cbIS</i> homolog (% identity, % similarity to CbiS from <i>L. innocua</i> ) <sup>c</sup> | Locus tag of predicted <i>cobT</i> homolog(s) (% identity, % similarity to CobT from <i>S. enterica</i> ) <sup>d</sup> | Locus tag of predicted <i>bluB</i> homolog (% identity, % similarity to BluB from <i>R. rubrum</i> ) <sup>g</sup> | Locus tag of predicted <i>cbiZ</i> homolog (% identity, % similarity to CbiZ from <i>M. mazei</i> ) <sup>h</sup> |
|--------------------------------------------------|--------------------------------------------------------------------------------------------------------------------|--------------------------------------------------------------------------------------------------------------------|------------------------------------------------------------------------------------------------------------------------|-------------------------------------------------------------------------------------------------------------------|------------------------------------------------------------------------------------------------------------------|
| <i>Alkaliphilus metalliredigens</i> QYMF         | Amet_0066 (41%, 58%)                                                                                               | Amet_0067 (34%, 54%)                                                                                               | Amet_0464 (45%, 62%)                                                                                                   |                                                                                                                   |                                                                                                                  |
| <i>Alkaliphilus oremlandii</i> OhILAs            | Clos_2207 (33%, 56%)                                                                                               | Clos_2206 (36%, 58%)                                                                                               |                                                                                                                        |                                                                                                                   |                                                                                                                  |
| <i>Anaerotruncus colihominis</i> DSM 17241       |                                                                                                                    | ANACOL_03809 (35%, 55%)                                                                                            | ANACOL_02043 (41%, 61%)                                                                                                |                                                                                                                   |                                                                                                                  |
| <i>Anoxybacillus flavithermus</i> WK1            | Aflv_1051 (33%, 53%)                                                                                               | Aflv_1052 (28%, 48%)                                                                                               | Aflv_2169 (42%, 59%)                                                                                                   |                                                                                                                   | Aflv_1043 <sup>i</sup> (28%, 50%)                                                                                |
| <i>Bacillus coahuilensis</i> m4-4                | Bcoam_010100007990 (30%, 47%)                                                                                      |                                                                                                                    |                                                                                                                        |                                                                                                                   | Bcoam_010100007955 <sup>i</sup> (25%, 46%)                                                                       |
| <i>Bacillus halodurans</i> C-125                 |                                                                                                                    | BH0853 (33%, 54%)                                                                                                  | BH0284 (40%, 60%)                                                                                                      |                                                                                                                   | BH1587 <sup>i</sup> (34%, 50%)                                                                                   |
| <i>Carboxydotherrmus hydrogenoformans</i> Z-2901 | CHY_0775 (37%, 53%)                                                                                                | CHY_0776 (32%, 51%)                                                                                                | CHY_0480 (38%, 61%)                                                                                                    |                                                                                                                   |                                                                                                                  |
| <i>Clostridium botulinum</i> A Hall              | CLC_1007 (43%, 71%)                                                                                                | CLC_0877 (32%, 53%)                                                                                                |                                                                                                                        |                                                                                                                   |                                                                                                                  |
| <i>Clostridium perfringens</i> 13                | CPE1308 (42%, 69%)                                                                                                 | CPE1307 (26%, 50%)                                                                                                 | CPE1034 (38%, 60%)                                                                                                     |                                                                                                                   |                                                                                                                  |
| <i>Clostridium sporogenes</i> ATCC 15579         | CLOSPO_01660 (42%, 71%)                                                                                            | CLOSPO_01525 (31%, 52%)                                                                                            |                                                                                                                        |                                                                                                                   |                                                                                                                  |
| <i>Clostridium tetani</i> E88                    | CTC00741 (42%, 64%)                                                                                                | CTC00742 (36%, 58%)                                                                                                | CTC02290 (39%, 60%)                                                                                                    |                                                                                                                   |                                                                                                                  |
| <i>Desulfitobacterium hafniense</i> Y51          |                                                                                                                    | DSY2725 (34%, 50%)                                                                                                 | DSY2114 (42%, 61%)                                                                                                     |                                                                                                                   |                                                                                                                  |
| <i>Geobacillus kaustophilus</i> HTA426           | GK2256 (33%, 51%)                                                                                                  | GK2255 (30%, 45%)                                                                                                  | GK1793 (40%, 57%)                                                                                                      |                                                                                                                   | GK2264 <sup>i</sup> (29%, 48%)                                                                                   |

|                                                              |                                     |                                     |                                    |                                    |                                      |
|--------------------------------------------------------------|-------------------------------------|-------------------------------------|------------------------------------|------------------------------------|--------------------------------------|
| <i>Geobacillus thermodenitrificans</i> NG80-2                | GTNG_2189<br>(32%, 50%)             | GTNG_2188<br>(30%, 46%)             | GTNG_1683<br>(40%, 57%)            |                                    | GTNG_2197 <sup>i</sup><br>(27%, 47%) |
| <i>Heliobacterium modesticaldum</i> Ice1                     | HM1_1580<br>(33%, 51%)              | HM1_1579<br>(34%, 54%)              | HM1_2401<br>(41%, 62%)             |                                    | HM1_1855<br>(27%, 43%)               |
| <i>Lactobacillus brevis gravesensis</i> ATCC 27305           | HMPREF0496_0<br>555 (47%, 68%)      | HMPREF0496_0<br>556 (42%, 59%)      |                                    |                                    |                                      |
| <i>Lactobacillus buchneri</i> ATCC 11577                     | HMPREF0497_0<br>511 (47%, 67%)      | HMPREF0497_0<br>512 (43%, 60%)      |                                    |                                    |                                      |
| <i>Lactobacillus hilgardii</i> ATCC 8290                     | HMPREF0519_1<br>876 (54%, 70%)      | HMPREF0519_1<br>306 (42%, 60%)      |                                    |                                    |                                      |
| <i>Listeria innocua</i> Clip11262                            | lin1153 (100%,<br>100%)             | lin1110 (100%,<br>100%)             |                                    |                                    |                                      |
| <i>Listeria monocytogenes</i> EGD-e                          | lmo1190 (97%,<br>98%)               | lmo1146 (81%,<br>87%)               |                                    |                                    |                                      |
| <i>Listeria welshimeri</i> sv 6b<br>SLCC5334                 | lwe1147 (94%,<br>98%)               | lwe1104 (78%,<br>88%)               |                                    |                                    |                                      |
| <i>Lysinibacillus sphaericus</i> C3-41                       | Bsph_2450<br>(31%, 50%)             | Bsph_2451<br>(26%, 47%)             | Bsph_1664<br>(48%, 64%)            | Bsph_2918<br>(33%, 49%)            | Bsph_0967 <sup>i</sup><br>(25%, 45%) |
| <i>Moorella thermoacetica</i> ATCC 39073                     | Moth_0191<br>(48%, 69%)             | Moth_0190<br>(35%, 51%)             | Moth_1101<br>(41%, 63%)            |                                    |                                      |
|                                                              |                                     |                                     | Moth_1721<br>(41%, 59%)            |                                    |                                      |
| <i>Natranaerobius thermophilus</i> JW/NM-WN-LF               | Nther_0938<br>(45%, 68%)            | Nther_0939<br>(33%, 54%)            |                                    |                                    |                                      |
| <i>Propionibacterium acnes</i> KPA171202                     |                                     | PPA0108 (27%,<br>46%)               | PPA0441 <sup>e</sup> (40%,<br>57%) | PPA0953 <sup>f</sup> (38%,<br>53%) |                                      |
|                                                              |                                     |                                     | PPA0953 <sup>f</sup> (33%,<br>50%) |                                    |                                      |
| <i>Symbiobacterium thermophilum</i> IAM 14863                | STH1931 (41%,<br>54%)               | STH1930 (35%,<br>55%)               |                                    |                                    |                                      |
| <i>Thermoanaerobacter brockii</i> subsp. <i>finnii</i> Ako-1 | ThebrDRAFT_14<br>29 (34%, 57%)      | ThebrDRAFT_14<br>30 (33%, 53%)      |                                    |                                    |                                      |
| <i>Thermoanaerobacter ethanolicus</i> CCSD1                  | TeCCSD1DRAF<br>T_0616 (33%,<br>56%) | TeCCSD1DRAF<br>T_0615 (35%,<br>54%) |                                    |                                    |                                      |
| <i>Thermoanaerobacter italicus</i> Ab9                       | ThitDRAFT_083                       | ThitDRAFT_083                       |                                    |                                    |                                      |

|                                                                     |                             |                             |  |  |                    |
|---------------------------------------------------------------------|-----------------------------|-----------------------------|--|--|--------------------|
|                                                                     | 7 (33%, 55%)                | 6 (33%, 54%)                |  |  |                    |
| <i>Thermoanaerobacter mathranii</i> subsp. <i>mathranii</i> str. A3 | TmathDRAFT_1 629 (34%, 55%) | TmathDRAFT_1 628 (33%, 54%) |  |  |                    |
| <i>Thermoanaerobacter pseudethanolicus</i> ATCC 33223               | Teth39_1898 (34%, 57%)      | Teth39_1897 (33%, 53%)      |  |  |                    |
| <i>Thermoanaerobacter tengcongensis</i> MB4                         | TTE0378 (37%, 57%)          | TTE0379 (36%, 53%)          |  |  | TTE2426 (44%, 65%) |
| <i>Thermoanaerobacterium thermosaccharolyticum</i> DSM 571          | TtheDRAFT_223 9 (35%, 55%)  | TtheDRAFT_224 0 (32%, 50%)  |  |  |                    |

<sup>a</sup> For species with multiple sequenced strains, a single representative example has been selected.

<sup>b</sup> Identified by BLAST search of the Integrated Microbial Genomes database (<http://img.jgi.doe.gov>), accessed March 23, 2010 (Markowitz *et al.*, 2006).

<sup>c</sup> Identified by BLAST search of the Integrated Microbial Genomes database (<http://img.jgi.doe.gov>), accessed March 23, 2010 (Markowitz *et al.*, 2006).

<sup>d</sup> Identified by BLAST search of the Integrated Microbial Genomes database (<http://img.jgi.doe.gov>), using the *Salmonella enterica* CobT sequence (Trzebiatowski *et al.*, 1994) as the search term, accessed June 18, 2010 (Markowitz *et al.*, 2006). Percent identity and percent similarity were calculated with the BLAST 2 Sequences program (McGinnis & Madden, 2004).

<sup>e</sup> This gene encodes a fusion protein between CobT and a CobU (adenosylcobinamide kinase / adenosylcobinamide-phosphate guanylyltransferase) ortholog (Markowitz *et al.*, 2006).

<sup>f</sup> This gene encodes a fusion protein between CobT and a BluB (aerobic DMB synthase) ortholog (Markowitz *et al.*, 2006).

<sup>g</sup> Identified by BLAST search of the Integrated Microbial Genomes database (<http://img.jgi.doe.gov>), using the *Rhodospirillum rubrum* BluB sequence (Gray & Escalante-Semerena, 2007) as the search term, accessed April 8, 2010 (Markowitz *et al.*, 2006).

<sup>h</sup> Identified by BLAST search of the Integrated Microbial Genomes database (<http://img.jgi.doe.gov>), using the *Methanosarcina mazei* CbiZ sequence (Gray *et al.*, 2008) as a search term, accessed April 8, 2010 (Markowitz *et al.*, 2006).

<sup>i</sup> These genes encode fusion proteins between CbiZ and homologs of BtuD, the ATPase component of the Btu corrinoid-specific ABC transport system (Gray *et al.*, 2008; Markowitz *et al.*, 2006).

**Table S4: Primers used in this study**

| Primer | Sequence <sup>a</sup>                                                   |
|--------|-------------------------------------------------------------------------|
| [1]    | CTG TTT CTC CAT ACC CGT T                                               |
| [2]    | GGC TGA AAA TCT TCT CTC AT                                              |
| [3]    | ACT GAA <u>GAA TTC</u> ATG AA ATT CAA AAA TTA GTA TTA TGT GCG           |
| [4]    | ACT GAA <u>TCT AGA TTA</u> GTA CCC GGC AAT TCG TCT T                    |
| [5]    | GAC GTC <u>CCG GGC TAG CAT</u> GCC TCA AGT GAG GGA TTT                  |
| [6]    | GTG CGG CCG <u>CAA GCT TTC</u> AGC CAT GGT AAT TCC TCA A                |
| [7]    | CGA GCG GAA CCG CCT CG                                                  |
| [8]    | CCA TTC GCC AAT CCG GAT                                                 |
| [9]    | TCG TAC TAC CAT CAC CAT CAC                                             |
| [10]   | CTA GCA GGA <u>GGA ATT CCA</u> CCA TGC CTC AAG TGA GGG ATT T            |
| [11]   | CAA AAC AGC <u>CAA GCT TTC</u> AGC CAT GGT AAT TCC TCA A                |
| [12]   | CTA GCA GGA <u>GGA ATT CTT</u> GAA GAT TCA AAA ATT AGT ATT ATG<br>TGC G |
| [13]   | CTT GAG GCA TTC TAG ATT AGT ACC CGG CAA TTC GTC TT                      |
| [14]   | CGG GTA CTA ATC TAG AAT GCC TCA AGT GAG GGA TTT                         |
| [15]   | CCA AGC TTG CAT <u>GCC TGC AGT</u> CAG CCA TGG TAA TTC CTC AA           |

<sup>a</sup> Restriction sites introduced for cloning are underlined.

## FIGURES

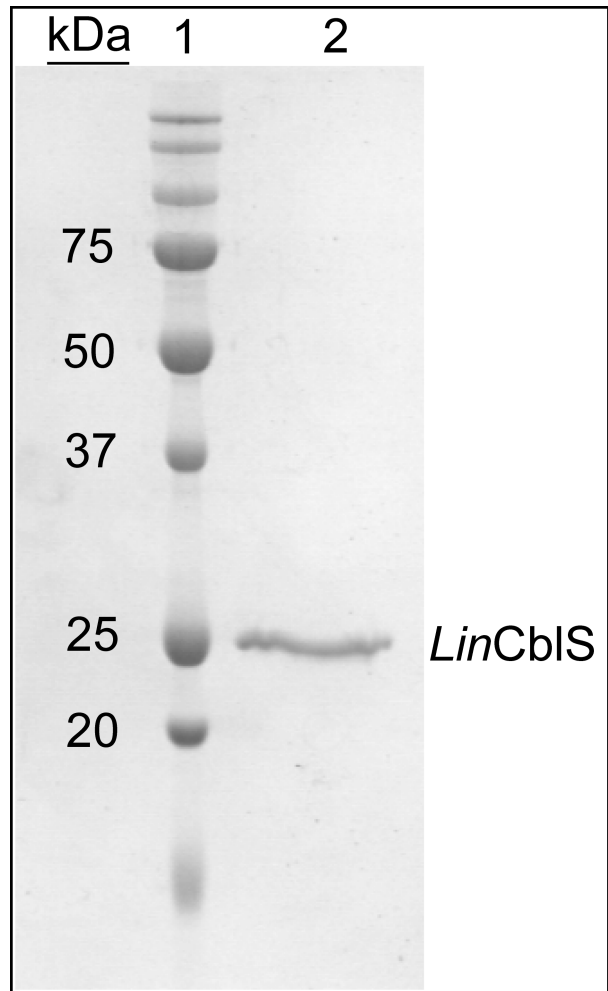

**Figure S1. Purification of *LinCbIS* protein.** Purified *LinCbIS* (2  $\mu$ g) was resolved by 12% SDS-PAGE (Laemmli, 1970) and stained with Coomassie Blue (Sasse, 1991). Lane 1. Electrophoretic mobility of molecular mass markers (Precision Plus Protein™ Standards, Bio-Rad Laboratories). Molecular mass in kilodaltons (kDa) is indicated. Lane 2. *LinCbIS* protein, > 98% homogenous.



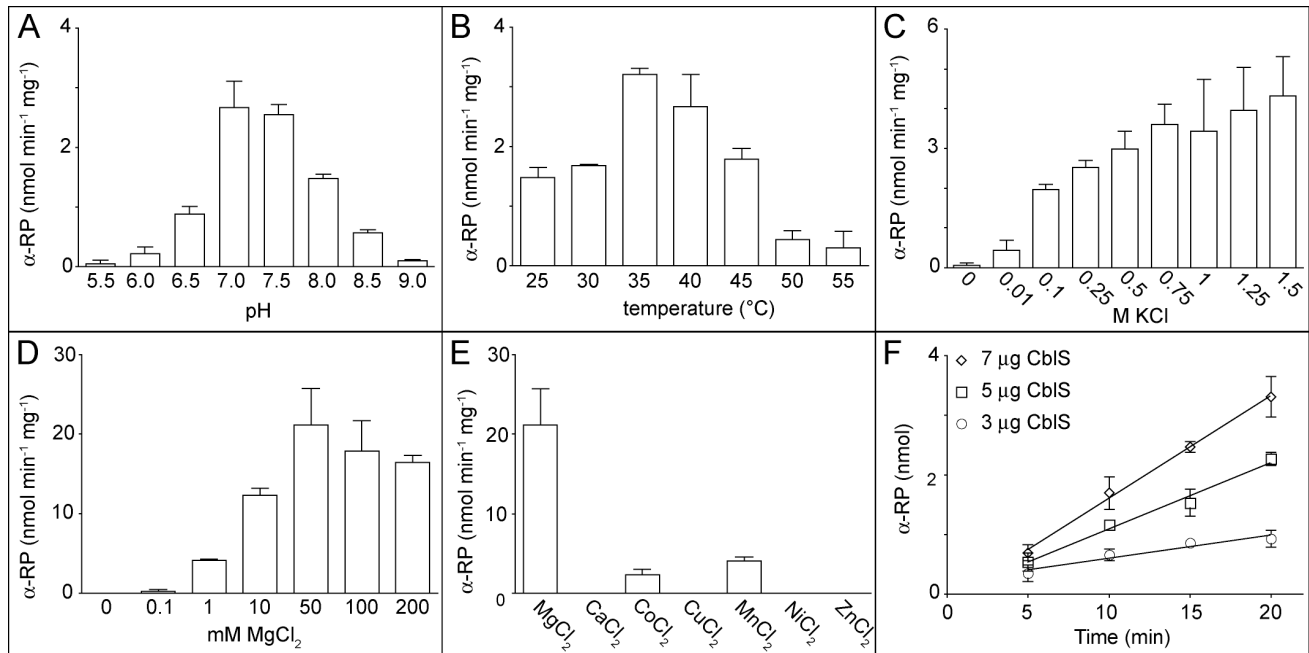

**Figure S2. Optimization of *LinCbIS* reaction conditions.**  $\alpha$ -R kinase activity of *LinCbIS* (expressed as nanomoles of  $\alpha$ -RP min<sup>-1</sup> mg<sup>-1</sup> protein) is shown, with error bars of one standard deviation. Unless indicated, reactions contained Tris-HCl buffer (100 mM, pH 7.0), TCEP (5 mM), KCl (0.75 M), MgCl<sub>2</sub> (50 mM),  $\alpha$ -R (30  $\mu$ M), *LinCbIS* (3 - 10  $\mu$ g) and ATP (1 mM) and were incubated at 35°C. **A.** *LinCbIS* activity as a function of pH at 37°C, 0.5 M KCl, 1 mM MgCl<sub>2</sub>. **B.** *LinCbIS* activity as a function of temperature at 0.5 M KCl, 1 mM MgCl<sub>2</sub>. **C.** *LinCbIS* activity as a function of KCl concentration at 1 mM MgCl<sub>2</sub>. **D.** *LinCbIS* activity as a function of MgCl<sub>2</sub> concentration. **E.** *LinCbIS* activity in the presence of different divalent cations (50 mM). **F.** Product formation as a function of time and *LinCbIS* concentration at 60  $\mu$ M  $\alpha$ -R.

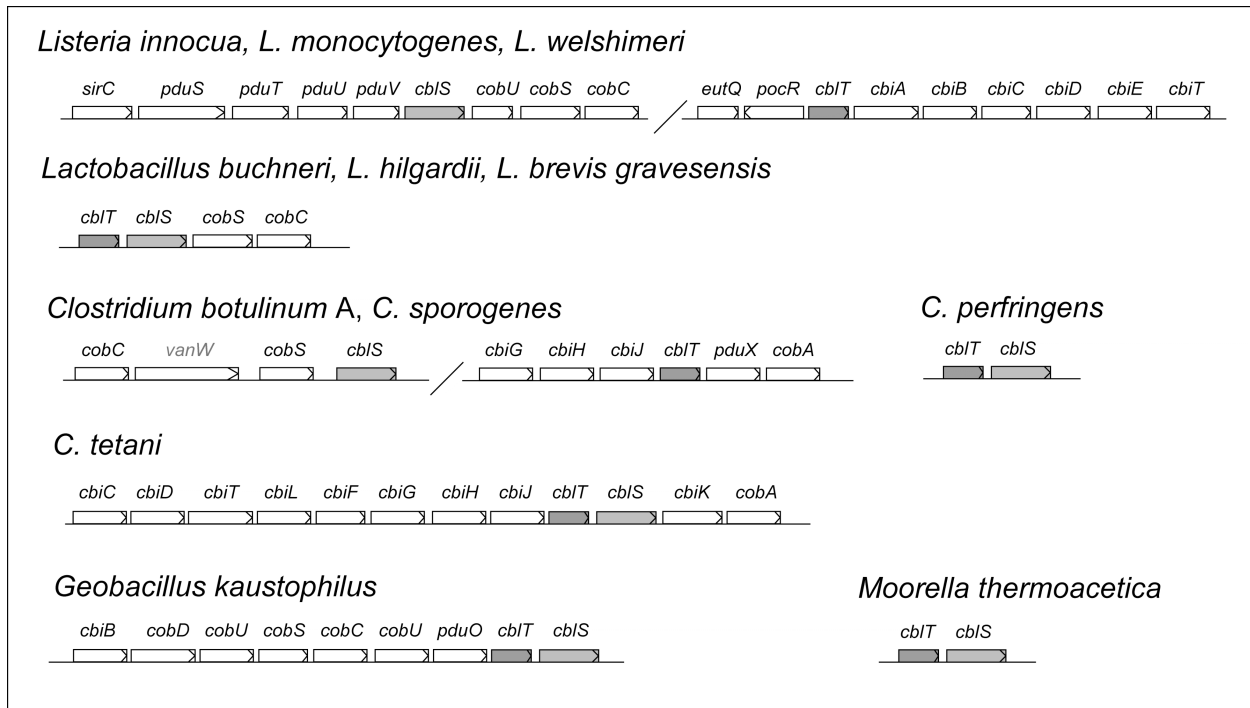

**Figure S3. Genomic context of *cbiT* and *cbIS* homologs in selected bacteria.** The organization of genes encoding products predicted to be involved in coenzyme B<sub>12</sub> biosynthesis or utilization near predicted *cbiT* (dark grey) and *cbIS* (light grey) homologs in representative bacterial genomes is indicated. Arrows within boxes indicate the direction of transcription of the indicated gene. Diagonal slashes indicate gaps between *cbiT*- and *cbIS*-associated loci in a single genome. The products of the indicated genes are as follows (the locus tags of the *Listeria innocua* Clip11262 homolog of each gene is provided in parentheses): *sirC* (*lin1105*), precorrin-2 dehydrogenase; *pduS* (*lin1106*) and *pduV* (*lin1107*), predicted 1,2-propanediol utilization proteins; *pduT* (*lin1108*) and *pduU* (*lin1109*), metabolosome shell proteins involved in 1,2-propanediol utilization; *cbIS* (*lin1110*),  $\alpha$ -R kinase; *cobU* (*lin1111*), bifunctional AdoCbi kinase / GTP:AdoCbi-P guanylyltransferase; *cobS* (*lin1112*), AdoCbi-P synthase; *cobC* (*lin1113*), AdoCbi-5'-P phosphatase; *eutQ* (*lin1151*), predicted ethanolamine utilization protein; *pocR* (*lin1152*), putative 1,2-propanediol-sensing transcription factor; *cbiT* (*lin1153*),  $\alpha$ -R transporter; *cbiA* (*lin1154*), cobyrinic acid *a,c*-diamide synthase; *cbiB* (*lin1155*), AdoCbi-P synthetase; *cbiC* (*lin1156*), precorrin-8X methylmutase; *cbiD* (*lin1157*), cobalt-precorrin-6A synthase; *cbiE* (*lin1158*), precorrin-6B methylase; *cbiT* (*lin1159*), precorrin-8W decarboxylase; *vanW*, vancomycin B-type resistance protein (*C. botulinum* locus tag CLC\_0875, no *L. innocua* homolog and no known role in coenzyme B<sub>12</sub> metabolism); *cbiG* (*lin1161*), cobalt-precorrin-5A hydrolase; *cbiH* (*lin1162*), precorrin-3B C17-methyltransferase; *cbiJ* (*lin1163*), precorrin-6X reductase; *pduX* (*lin1134*), L-threonine kinase; *cobA* (*C. tetani* locus tag CTC00744, no *L. innocua* homolog), ATP:corrinoid adenosyltransferase; *cbiL* (*lin1166*), precorrin-2 methyltransferase; *cbiF* (*lin1160*), precorrin-4 C-11 methyltransferase; *cbiK* (*lin1165*), cobalt chelatase; *pduO* (*lin1128* and *lin1172*), ATP:corrinoid adenosyltransferase.

|                                 |                                                       |     |
|---------------------------------|-------------------------------------------------------|-----|
| <i>A. metaliredigens</i>        | -----                                                 |     |
| <i>A. oremlandii</i>            | -----                                                 |     |
| <i>A. flavithermus</i>          | -----                                                 |     |
| <i>B. coahuilensis</i>          | -----                                                 |     |
| <i>C. hydrogenoformans</i>      | -----                                                 |     |
| <i>C. botulinum</i>             | -----                                                 |     |
| <i>C. perfringens</i>           | -----                                                 |     |
| <i>C. sporogenes</i>            | -----                                                 |     |
| <i>C. tetani</i>                | -----                                                 |     |
| <i>G. kaustophilus</i>          | -----                                                 |     |
| <i>G. thermodenitrificans</i>   | -----                                                 |     |
| <i>H. modesticaldum</i>         | -----MSNMP                                            | 5   |
| <i>L. gravesensis</i>           | -----                                                 |     |
| <i>L. buchneri</i>              | -----                                                 |     |
| <i>L. hilgardii</i>             | -----                                                 |     |
| <i>L. innocua</i>               | -----                                                 |     |
| <i>L. monocytogenes</i>         | -----                                                 |     |
| <i>L. welshimeri</i>            | -----                                                 |     |
| <i>L. sphaericus</i>            | -----                                                 |     |
| <i>M. thermoacetica</i>         | -----MAKPE                                            | 5   |
| <i>N. thermophilus</i>          | -----MLS--                                            | 3   |
| <i>S. thermophilum</i>          | MPLEHLTTTSGIGAPKHRCTVACRTGTGESRAQRGAAYGHNGVPTKRLL     | 50  |
| <i>T. brockii</i>               | -----                                                 |     |
| <i>T. ethanolicus</i>           | -----                                                 |     |
| <i>T. italicus</i>              | -----                                                 |     |
| <i>T. mathranii</i>             | -----                                                 |     |
| <i>T. pseudethanolicus</i>      | -----                                                 |     |
| <i>T. tengcongensis</i>         | -----                                                 |     |
| <i>T. thermosaccharolyticum</i> | -----                                                 |     |
|                                 |                                                       |     |
| <i>A. metaliredigens</i>        | -MISRNRKQMDTKMLVKMAMLIASGIGAMIKIQG---SIALD            | 46  |
| <i>A. oremlandii</i>            | -MNNTKNVMSMSNIQVITRSGLLIGLSAIGAMIKIQG---TIAFDS        | 46  |
| <i>A. flavithermus</i>          | -----MRRFTLLVMFISLSVIGSLIKIPFTIGSIALDS                | 38  |
| <i>B. coahuilensis</i>          | -----MKTSRVNLIAAFIALSVIGGFIKIPSPISSIALDS              | 40  |
| <i>C. hydrogenoformans</i>      | -----MNIRTLTLTALIALIALSAVGAFIKIPSPGTVALD              | 40  |
| <i>C. botulinum</i>             | -----MKTKRLVIMGLFIALSFVGANIKIMG---SIAFDS              | 37  |
| <i>C. perfringens</i>           | -MNFTEKPKRDLVKSLCFSAILIAISVILANFPIFS---SIALDS         | 46  |
| <i>C. sporogenes</i>            | -----MKTKRLVIVGLFIALSFVGANIKIMG---SIAFDS              | 37  |
| <i>C. tetani</i>                | -----MKTNKMVITALFIALSFVGANIKIMG---TVAFDA              | 37  |
| <i>G. kaustophilus</i>          | -----MNRRLAWTAVCLIALSAIGSFIKLPTFVGSIALDS              | 39  |
| <i>G. thermodenitrificans</i>   | -----MNRRFVWLAVCMALSVIGSFIKLPTFVGSIALDS               | 39  |
| <i>H. modesticaldum</i>         | TQYNEVGPWSKSVRSIALMGLLIALSAVGAMVKLPSPVGTIGLDS         | 55  |
| <i>L. gravesensis</i>           | -----MRNDYLKKLMLTTIFLALCVGANVKILG---SIALDS            | 40  |
| <i>L. buchneri</i>              | -----MRNDYLKKLMLTTIFLALCVGANVKILG---SIALDS            | 40  |
| <i>L. hilgardii</i>             | -----MTQSDRLNRLTLAAMLLALCVGANVKIMG---SVAFDA           | 41  |
| <i>L. innocua</i>               | -----MKIQKLVLCAMLIAMCVIGANIKIMG---SVAFDA              | 37  |
| <i>L. monocytogenes</i>         | -----MKIQKLVLCAMLIAMCVIGANIKIMG---SVAFDA              | 37  |
| <i>L. welshimeri</i>            | -----MKIQKLVLCAMLIAMCVIGANIKIMG---SVAFDA              | 37  |
| <i>L. sphaericus</i>            | -----MDRQTLMTWILTAMVAAICAVGAAIKVPAFISTAALDS           | 43  |
| <i>M. thermoacetica</i>         | LSSPAVKASRWTARRLATLAMLIALSTVGANLKIPTSITGTPAFDS        | 55  |
| <i>N. thermophilus</i>          | -----LDHRELVKIALIALSMIGSQIKIPSLTGTPALDS               | 43  |
| <i>S. thermophilum</i>          | LGRGGLLVLLARTNTLVRGLIALSVLGAYIKLGP--SSIAFDA           | 98  |
| <i>T. brockii</i>               | -MK-EKANALKNVKTLTLVAMLIALSavgALIKIFN---TVAFDA         | 45  |
| <i>T. ethanolicus</i>           | -MK-EKANALKNVKTLTLVAMLIALSavgALIKIFN---TVAFDA         | 45  |
| <i>T. italicus</i>              | -MK-EKANALKNVKTLTLVAMLIALSavgALIKIFN---TVAFDA         | 45  |
| <i>T. mathranii</i>             | -MK-EKANTLKNVKTTLTLVAMLIALSavgALIKVFN---TVAFDA        | 45  |
| <i>T. pseudethanolicus</i>      | -MK-EKANALKNVKTLTLVAMLIALSavgALIKIFN---TVAFDA         | 45  |
| <i>T. tengcongensis</i>         | -MK-EKEVSLGNVKTTLTLVAMLIALSavgALIKIFN---TVAFDA        | 45  |
| <i>T. thermosaccharolyticum</i> | -MN-TKTTTIKNVKTLTLVAMLIAMSAVGAMIKIYN---TVAFDS         | 45  |
|                                 |                                                       |     |
| <i>A. metaliredigens</i>        | AALLGPMAGGIVAFAGELISALTAGEPMTVPMHLVVAVEMFIIVALFSV     | 96  |
| <i>A. oremlandii</i>            | AALFISPMAGGAVASLGEHLLTAFTSCFPLTLPMHMLTVVMGIAYFFGV     | 96  |
| <i>A. flavithermus</i>          | AAVLLGPTAAAVVASVGEHVVSALFGGEPILG-PFHILVAIEMAALLYIVGL  | 87  |
| <i>B. coahuilensis</i>          | AAMFSGMIGGFISIGHELLSSLSGGCFPLG-PFHFIIMIEMFICILFIYAL   | 89  |
| <i>C. hydrogenoformans</i>      | AALYLSPLGALVAALGHELLSAATAGFPPLTLPLHLLVALEMATFAAVFGV   | 90  |
| <i>C. botulinum</i>             | GTLLIGPIMGAIIGAVAFHLSALTSCEPPLSLPVMIVMVDMAVTMILFGI    | 87  |
| <i>C. perfringens</i>           | GGIILSPVGGIIGLLAHFLVALRTGFPPLSLPVHILVALEMVVVYITSI     | 96  |
| <i>C. sporogenes</i>            | GTLLIGPIMGAIIGAVAFHLSALTSCEPPLSLPVMIVMVDMAVTMLLFGV    | 87  |
| <i>C. tetani</i>                | GALLLGPVYGGIIGGVGHEFLTALTSCEPPLSLPVHLVITVIMAAATMAIFGL | 87  |
| <i>G. kaustophilus</i>          | AAGVLGPRAGAAVAGLGHLSVALIGGCFPLG-PVHWFVALEMAGLGALFAV   | 88  |
| <i>G. thermodenitrificans</i>   | AAAVLGPQAGATVAGLGHFISAYIGGCFPLG-PHEHLVACEMAVLGAFAA    | 88  |
| <i>H. modesticaldum</i>         | AAALGATGGMIVIALGHELLTAMVVGFPPLTLPVHLFIALQAMWAYVFRR    | 105 |
| <i>L. gravesensis</i>           | GAILLGAIGAFILGFFGHLLSAMLAGEPPLTLPVHLIIGVMMACMFVFGV    | 90  |
| <i>L. buchneri</i>              | GAILLGAIGAFILGFFGHLLSAMLAGEPPLTLPVHLIIGVMMACMFVFGV    | 90  |

|                                 |                                                       |     |
|---------------------------------|-------------------------------------------------------|-----|
| <i>L. hilgardii</i>             | GAVLLGPFWFGATLGLFGELVSAALAGFPLTLPIHLIIGVAMGICMLIFGL   | 91  |
| <i>L. innocua</i>               | GTLLLGPMYGAVALGIFGELTSAALLAGFPLTLPIHLIVAGMMGVTMIAYGF  | 87  |
| <i>L. monocytogenes</i>         | GTLLLGPMYGAVALGIFGELTSAALLAGFPLTLPIHLIVAGMMGVTMIAYGF  | 87  |
| <i>L. welshimeri</i>            | GTLLLGPMYGAVALGIFGELTSAALLAGFPLTLPIHLIVAGMMGVTMIAYGF  | 87  |
| <i>L. sphaericus</i>            | GVVFLSPLLAGIGGFIFGELTSAALLAGFPLG-PLHVIIVAVEMFIVVWIFGI | 92  |
| <i>M. thermoacetica</i>         | GALLLGPADGALIAALGELTSAALLAGFPLTPPLHLVIAAGMAAVVALFAI   | 105 |
| <i>N. thermophilus</i>          | AAFVWVGKYAAAIIGFFGELTSAALLAGFPLTLPIHLIVAGMMGVTMIAYGF  | 93  |
| <i>S. thermophilum</i>          | AALLMGPAAAGALICGLGELTSAALLAGFPLTLPIHLIVAGMMGVTMIAYGF  | 148 |
| <i>T. brockii</i>               | AALYLGSWYGALVISLGEMLTAITSGFPLGLTNHIYIAVQMGLYAYLKF     | 95  |
| <i>T. ethanolicus</i>           | AALYLGSWYGALVISLGEMLTAITSGFPLGLTNHIYIAVQMGLYAYLKF     | 95  |
| <i>T. italicus</i>              | AALYLGSWYGALVISLGEMLTAITSGFPLGLTNHIYIAVQMGLYAYLFRF    | 95  |
| <i>T. mathranii</i>             | AALYLGSWYGALVISLGEMLTAITSGFPLGLTNHIYIAVQMGLYAYLFRF    | 95  |
| <i>T. pseudethanolicus</i>      | AALYLGSWYGALVISLGEMLTAITSGFPLGLTNHIYIAVQMGLYAYLKF     | 95  |
| <i>T. tengcongensis</i>         | AALYLGSLYGAIIVIALGELTSAALLAGFPLTLPIHLIVAGMMGVTMIAYGF  | 95  |
| <i>T. thermosaccharolyticum</i> | ASLYFGSYGAIIVISLGEMLTAITSGFPLGLTNHIYIAVQMGLYAYLFRF    | 95  |
|                                 |                                                       |     |
| <i>A. metaliredigens</i>        | VW-----QKINPVAIVGILLNGVAGLLVVPMSILLGLPLNGWALF         | 139 |
| <i>A. oremlandii</i>            | IE-----RKVNGVLACVIAILLNGPVATFIAGITASLLGLPLSGSAMF      | 139 |
| <i>A. flavithermus</i>          | LIR-----RGWFIFSYVCFFIG-NALLAPLPFV-----WIMS-PAFV       | 122 |
| <i>B. coahuilensis</i>          | FYK-----TNKWV--AFLFFIGANTFLAPLPFL-----FFHGPIFI        | 124 |
| <i>C. hydrogenoformans</i>      | LG-----KRN-VIVGIVVATLLNGVIAPLSFAI-----MPKFGMAFF       | 126 |
| <i>C. botulinum</i>             | VYNKFKNKNNILAAIVATVVAVIINGPVSFVAI-----IPIAGKG-V       | 128 |
| <i>C. perfringens</i>           | IF-----NRGKVLIVGIVGTLNGIVFTLITGVFMYFVLGGMNPIDFL       | 139 |
| <i>C. sporogenes</i>            | VYNKLNKNKNNILAAIVATIVAVIINGPVSFVAI-----IPITGKG-V      | 128 |
| <i>C. tetani</i>                | VYKVLVKKNKVLAAMILAIVGIVVNGPINLLVLTPLL---MPIMGKAGI     | 133 |
| <i>G. kaustophilus</i>          | LHR-----RGWKIGSAVVFFIG-NAFLAPLPLA-----VSFG-WPFV       | 123 |
| <i>G. thermodenitrificans</i>   | MYG-----RGWRFGGAIAFFVG-NVFLAPLPFV-----IAFG-WPLV       | 123 |
| <i>H. modesticaldum</i>         | VN-----QFGLTAAFAAAVCLNGVSSSLTM-----LLGGWGAV           | 140 |
| <i>L. gravesensis</i>           | LRQRLN-LSRGLVIVISDAIGYLVNPLELTL-----YPIKQSV           | 130 |
| <i>L. buchneri</i>              | LRQRLT-LSRGLVIVISDAIGYLVNPLELTL-----YPIKQSV           | 130 |
| <i>L. hilgardii</i>             | VRKWLK-KDTLKGVLTSVLYGAINVPIELVLL-----YPLMKQA-V        | 131 |
| <i>L. innocua</i>               | TRHKLAEKNQLVAISASSVAVFVFNCPPLSLLAL-----YPLMQA-V       | 128 |
| <i>L. monocytogenes</i>         | TRQKLAENQLVAISVSSIVAFVFNCPPLSLLAL-----YPLMQA-V        | 128 |
| <i>L. welshimeri</i>            | TRQKLADKNQLIAVSVSSMVAFVFNCPPLSLLAL-----YPLMQA-V       | 128 |
| <i>L. sphaericus</i>            | MHK-----KGMHFWKVVALVL-NGIVAPLPFY-----FIIS-PAFF        | 127 |
| <i>M. thermoacetica</i>         | FY-----RFS-PWLGIAAGIALNGLLPLALFIP-----LPGFGKAF        | 141 |
| <i>N. thermophilus</i>          | VN-----NYSGRAAGVLAGMVLNGLLPLGIFVL-----IPGFGIFF        | 130 |
| <i>S. thermophilum</i>          | AA-----RRFGLVAGAAVLVAVANGILAPALLALLP-----NPLGLGLF     | 186 |
| <i>T. brockii</i>               | FY-----RKFNIYIAVIAATILNGPVATLLF-----VPIFGWGF          | 130 |
| <i>T. ethanolicus</i>           | FY-----QKFNIIYIAVIAATILNGPVATLLF-----VPIFGWGF         | 130 |
| <i>T. italicus</i>              | FY-----RKFNIYIAVIVATILNGPVATLLF-----VPIFGWGF          | 130 |
| <i>T. mathranii</i>             | FY-----RKFNIYIAVIVATILNGPVATLLF-----VPIFGWGF          | 130 |
| <i>T. pseudethanolicus</i>      | FY-----RKFNIYIAVIAATILNGPVATLLF-----VPIFGWGF          | 130 |
| <i>T. tengcongensis</i>         | FY-----KKFNIVYVAIVLTTLLNGPLATLLF-----VPMFGWGF         | 130 |
| <i>T. thermosaccharolyticum</i> | AY-----KKFNISYVAVAVGTILNGPVATLIF-----VPQYGWGF         | 130 |
|                                 |                                                       |     |
| <i>A. metaliredigens</i>        | AVIWMPLLIGSTVNIILIAASLYKIMGKGSVNGN-----               | 173 |
| <i>A. oremlandii</i>            | TALVIPLTVVAAVNVILAYIIFKVLPRK-----                     | 167 |
| <i>A. flavithermus</i>          | LSIIPPLALATGVNLAIAVAVVSKALQRAWGKQ-----HA----          | 156 |
| <i>B. coahuilensis</i>          | FSLPLSLGIATVNVNIIILVILLPKIQWIYSHRFSGTFO-----          | 162 |
| <i>C. hydrogenoformans</i>      | TAMVVPLLVASFVNILLAGLTARALRGKTER-----                  | 157 |
| <i>C. botulinum</i>             | LALLPILSLAALANVITAIIIYRFIPEKYFQR----DK-----           | 162 |
| <i>C. perfringens</i>           | KLLGLPLTLASLVNIVVAFIVSKGLKNANI-----                   | 169 |
| <i>C. sporogenes</i>            | LAILPILSLAALANVITAIIIYRFIPEKYFER---NK-----            | 162 |
| <i>C. tetani</i>                | FALVPVLSGVAAINAVVAVLIYKFLPRSLKKY----ENK----           | 168 |
| <i>G. kaustophilus</i>          | FAVIPPLSAAAANVLIALAVMPVVVRLAAKAGVEAPHA---             | 162 |
| <i>G. thermodenitrificans</i>   | IAVIPPLSVATAMNIIIVAMVMPVSVVRLAAKVGKAPHA---            | 162 |
| <i>H. modesticaldum</i>         | MAVMPFLVAASAVNVGLAAAAYRGMKGIL-----                    | 169 |
| <i>L. gravesensis</i>           | VALFLPLTIATVNLNIIICELVSAALPKRVRR--FKALKH----          | 168 |
| <i>L. buchneri</i>              | VALLPLTIATVNLNIIICELVSAALPKRVRR--FKALKH----           | 168 |
| <i>L. hilgardii</i>             | WAFVPLTIATVNLNIIICELVSAALPKRVRR--FKALKH----           | 170 |
| <i>L. innocua</i>               | FVLFVPLAIGSICNIFVAEVVYQVLPERWKRR--IAGY-----           | 164 |
| <i>L. monocytogenes</i>         | FVLFVPLAIGSICNIFVAEVVYQVLPERWKRR--IAGY-----           | 164 |
| <i>L. welshimeri</i>            | FVLFVPLAIGSICNIFVAEVVYQVLPERWKRR--IAGY-----           | 164 |
| <i>L. sphaericus</i>            | WGALGSIFATINLIIIVAVVMPILSKVFVRKAGRV-----              | 163 |
| <i>M. thermoacetica</i>         | LAMVPLLIIASALNIVLAATAFTSLRRVFPASYAAGRKGEGK            | 184 |
| <i>N. thermophilus</i>          | MGMVVPVTVASAVNIGLAVTAAPVCSQFLNRKPV-----               | 164 |
| <i>S. thermophilum</i>          | AAALPLTVAAAGANAVALLVVGLRRRAGVEG-----                  | 218 |
| <i>T. brockii</i>               | AAWVPLTIASFANVFLAALVYKAIPKRSRE-----                   | 161 |
| <i>T. ethanolicus</i>           | AAWVPLTIASFANVFLAALVYKAIPKRSRE-----                   | 161 |
| <i>T. italicus</i>              | AAWVPLTIASFANVFLAALVYKAIPKRSRE-----                   | 161 |
| <i>T. mathranii</i>             | AAWVPLTIASFANVFLAALVYKAIPKRSRE-----                   | 161 |
| <i>T. pseudethanolicus</i>      | AAWVPLTIASFANVFLAALVYKAIPKRSRE-----                   | 161 |
| <i>T. tengcongensis</i>         | ITWVPLTIASFANVFLAALVYKAIKILSKREQ-----                 | 160 |

*T. thermosaccharolyticum* VQMVFPLTTIASFANVFLAAVIFKAISTKIKR----- 161

**Figure S4. Alignment of CbIT homologs.** ClustalW2 (Larkin *et al.*, 2007) alignment of predicted CbIT proteins from 29 bacterial species (Table S4). Conserved residues are shaded. Putative transmembrane helices are underlined and were predicted from the *L. innocua* Clip11262 CbIT protein sequence with the toppred algorithm (<http://mobyli.pasteur.fr/cgi-bin/portal.py?form=toppred>, accessed March 24, 2010) (von Heijne, 1992; Claros & von Heijne, 1994).

|      |                                                                |     |
|------|----------------------------------------------------------------|-----|
| CblS | -----MPQVRDLSDVDVPG--GCVLTSCDISAGFGEKVH                        | 32  |
| PurM | MTDKTSLSYK DAGVDIDAGNALVGRIGVVKTRRPEVMGGLGGFGALCALPQKYREPV     | 60  |
| ThiL | -----MACGEFSLIARYFDRVRSRRLDVELG--IGDDCALLNIPEKQTLAI            | 44  |
| HypE | -----MQQLINSLFMEAFANFWLAEQED--QARLDAQLVAEGDRLAF                | 41  |
| SelD | -MSENSIRLTQYSHGAGCGCKISPKVLETILHSEQAKFVD--PNLLVGNETRDDAAVYDL   | 57  |
| CblS | DGLRVAPEVTARLTTLRVALLEMLASGAVVVAVS                             | 92  |
| PurM | VSGTDGVTGKLRRLAMDLKRHDTIGIDLVMCVNDL                            | 118 |
| ThiL | STDTLVAGN--HFLPDID-PADLAYKALAVNLS                              | 99  |
| HypE | STDSYVIDP--LEFFPGGN-IGKLAICGTAN--D                             | 94  |
| SelD | GNGTSVISTTDFEMPIVDNPFDFGRIAAATNAIS                             | 117 |
| CblS | GHIELNGSTEENMNVTQTSVG-----VLVTGFATKAALKLINVHEA                 | 133 |
| PurM | ASAVISGIAEGCLQSGCSLVGGETAEMPGMYHGEDYDVAGFCVGVVEKSEIIDGSKVSDG   | 178 |
| ThiL | LESFSDSLFDLLNYYDMQLIGGDTTRGP-----LSMTLGIHGFPVPMGRALTRSGAKPG    | 152 |
| HypE | LKAVVTSMAETARAAGIAIVTGDTKVVQRGAV-DKLFINTAGMGAI PANIHWAQTLTAG   | 153 |
| SelD | AREVTEGGRYACRQAGIALAGHSIDAP-----EPIFGLAVTGIVPTERVKKNSTAQAG     | 171 |
| CblS | AVLFAFG---EPIVGAEVLQRMEMPDPYPLVKQLVSD-----                     | 167 |
| PurM | DVLIALGSSGPHSNGYSLVRKILEVSGCDPQTELDGKPLA--DHLLAPTRIYVKS        | 235 |
| ThiL | DWLYVTGTGPGDSAAGLAILQNRLLQVADAKDADYLIKRRHLP--SPRILQG-QALRDLANS | 209 |
| HypE | DVLLVSGTLGDHGATILNLRQLGLDGLVSDCAVLTPLIQ--TLRDI PGVKALRDATR-    | 210 |
| SelD | CKLFLTKPLGIGVLTAEKKSLLKPEHQGLATEVVMCRMNIAGASFANIEGVKAMTDVTG-   | 230 |
| CblS | -----SRVLEVVPVSGKGMAYEANTLARLNDCVFEASG-----                    | 200 |
| PurM | -----LIEKVDVHAIAHLTGGGFWEENIPRVLPDNTQAVID-----ESSWQWPEVFNWL    | 283 |
| ThiL | AIDLSDGLISDLGHIVKASDCGARIDLALLPFSDALSRHVEP---EQALRWALSGGEDYE   | 266 |
| HypE | -----GGVNAVVEFAAACCGGIELSEAAPVPAVRGVCEL---LGLDALNFANEGKLV      | 262 |
| SelD | -----FGLLGHLSSEMCQAGVQARVDYEAIPKLPGVVEEYIKLGAVPGGTERNFASYGHLM  | 285 |
| CblS | -----VFNEATMNKTAG-----PASVILVAVKASEVKAFEQNFPAKCLGELRNYHG--     | 247 |
| PurM | QTAGNVEHHEMYRTFNCGVGMIIALPAPEVDKALALLNANGENAWKIGI IKASDSEQRVV  | 343 |
| ThiL | LCFTVPELNRGALDVALG---HLGVPTFCIGQMTADIEGLCFIRDGEFVTLDWKGYDHFA   | 323 |
| HypE | IAVERNAAEQVLAALHSH---PLGKDAALIGE VVERKGVRLAGLYGVKRTLDLPHAEPLP  | 319 |
| SelD | GEMPREVRDLLCDPQTSGG-LLAVMPEAENEVKATAAEFGIELTAIGELVPARGGRAMV    | 344 |
| CblS | ---                                                            |     |
| PurM | IE- 345                                                        |     |
| ThiL | TP- 325                                                        |     |
| HypE | RIC 322                                                        |     |
| SelD | EIR 347                                                        |     |

**Figure S5. Alignment of *LinCblS* with PurM ATP-binding superfamily proteins.** ClustalW2 (Larkin *et al.*, 2007) alignment of *L. innocua* CblS with PurM, ThiL, HypE, and SelD from *E. coli* MG1655. Conserved residues are shaded.

|                                 |                                                        |     |
|---------------------------------|--------------------------------------------------------|-----|
| <i>A. metaliredigens</i>        | -----M                                                 | 1   |
| <i>A. oremlandii</i>            | -----                                                  |     |
| <i>A. colihominis</i>           | MCYDNAIEQAAQPPKIDSKEGVPMTMPNQESLWTDYQELLEMTROCGFSS     | 50  |
| <i>A. flavithermus</i>          | -----                                                  |     |
| <i>B. halodurans</i>            | -----                                                  |     |
| <i>C. hydrogenoformans</i>      | -----M                                                 | 1   |
| <i>C. botulinum</i>             | -----M                                                 | 1   |
| <i>C. perfringens</i>           | -----M                                                 | 1   |
| <i>C. sporogenes</i>            | -----MYTRYKRKEVSFM                                     | 13  |
| <i>C. tetani</i>                | -----M                                                 | 1   |
| <i>D. hafniense</i>             | -----                                                  |     |
| <i>G. kaustophilus</i>          | -----                                                  |     |
| <i>G. thermodenitrificans</i>   | -----                                                  |     |
| <i>H. modesticaldum</i>         | -----                                                  |     |
| <i>L. gravesensis</i>           | -----                                                  |     |
| <i>L. buchneri</i>              | -----                                                  |     |
| <i>L. hilgardii</i>             | -----                                                  |     |
| <i>L. innocua</i>               | -----                                                  |     |
| <i>L. monocytogenes</i>         | -----                                                  |     |
| <i>L. welshimeri</i>            | -----                                                  |     |
| <i>L. sphaericus</i>            | -----                                                  |     |
| <i>M. thermoacetica</i>         | -----MTPATL                                            | 6   |
| <i>N. thermophilus</i>          | -----                                                  |     |
| <i>P. acnes</i>                 | -----MTAPNRVPSRCL                                      | 12  |
| <i>S. thermophilum</i>          | -----                                                  |     |
| <i>T. brockii</i>               | -----                                                  |     |
| <i>T. ethanolicus</i>           | -----                                                  |     |
| <i>T. italicus</i>              | -----                                                  |     |
| <i>T. mathranii</i>             | -----                                                  |     |
| <i>T. pseudethanolicus</i>      | -----                                                  |     |
| <i>T. tengcongensis</i>         | -----                                                  |     |
| <i>T. thermosaccharolyticum</i> | -----                                                  |     |
| <i>A. metaliredigens</i>        | EIKRCRDLTLIERAGQPNLVIACDSSGGIGEKPDQIKVPAE VVGYFTAR     | 51  |
| <i>A. oremlandii</i>            | -MFKFRDLTVIDIPPNHRMIIACDSSGGIGNKKHDVVQAEPE TLGYFTA H   | 49  |
| <i>A. colihominis</i>           | RIRKYRDL SILRLGDISLVVACDSNASNGEKPNDTHQNSYEETA VSA LK   | 100 |
| <i>A. flavithermus</i>          | ---MRDVLVLPDEENELVLA TDCSSGGI GLKQDDVVNVVPYDVVAYYGAR   | 46  |
| <i>B. halodurans</i>            | -----MATDASGGVGEKAKD HVHVPYEVVSYAAR                    | 30  |
| <i>C. hydrogenoformans</i>      | AGFKYRDLTIVPLSRE-KMVI AADSIGGVGPKAGDIVKTSGEIVGRYGAR    | 50  |
| <i>C. botulinum</i>             | NVKKVRDLT LISLDKDKTLVVACDSSSGISGSKNDILKIPAFYTGKFTIR    | 51  |
| <i>C. perfringens</i>           | QIYKFRDLTVLENEKN-KLVIACDSSGGIGENEGDFVKASNEIVSYF SAR    | 50  |
| <i>C. sporogenes</i>            | NVKKVRDLT LISLDKDKTLVVACDSSSGISGPKNDILQIPAFYTGKFAIR    | 63  |
| <i>C. tetani</i>                | RISKVRDLTLIKLTEDKNLVVACDSSGGIGSKPEDALKVPAIVGKLTAR      | 51  |
| <i>D. hafniense</i>             | MGYQGRDVEVVALNDAQYLVAACDSCGAI GEKELDAVKVPWRVTGRMTAR    | 50  |
| <i>G. kaustophilus</i>          | ---MRDVLFLFPADGME LAVAADGSAAVGDKPGD VVSVPDVVAYF SAR    | 46  |
| <i>G. thermodenitrificans</i>   | ---MRDVLFLPLTDGVELAIAADGSAAVGEKQGD AVFVPAETTAYFAAR     | 46  |
| <i>H. modesticaldum</i>         | MGYRGRDVEVVALSPEQCLVVA CDACGAI GAKELDAVQVSPYIVGIF TTR  | 50  |
| <i>L. gravesensis</i>           | --MKFRDLTIKPI SDKTALVIACDVSAGI GEKPD DLVHVTADVTA AFALR | 48  |
| <i>L. buchneri</i>              | --MKFRDLTIKPI SDKTALVIACDVSAGI GEKPD DLVHVTADVTA AFALR | 48  |
| <i>L. hilgardii</i>             | --MKFRDLTIKPI SDKTALVIACDVSAGI GEKPD DLVHVTADVTA AFALR | 48  |
| <i>L. innocua</i>               | -MPQVRDL SVIDVPGG-CVLTS CDISAGFGEKVH DGLRVAPEVTARLTLR  | 48  |
| <i>L. monocytogenes</i>         | -MPQVRDL SVIDVPGG-CVLTS CDISAGFGEKTH DGLMVAPEVTARLTLR  | 48  |
| <i>L. welshimeri</i>            | -MPQVRDL SVIDVPGG-CILTS CDISAGFGEKAH DGLVVTPEVTARLTLR  | 48  |
| <i>L. sphaericus</i>            | -----MKVGAFIATMDNAAAI GEKPD IVPASDQLTAYMTAR            | 37  |
| <i>M. thermoacetica</i>         | SPRRYRDLTILDLD AQRSLVIACD SAGAI GPKEADVVRVPGYV LGRFTAR | 56  |
| <i>N. thermophilus</i>          | MIFQLDDVKMIKMSKNEYLAVACD SLGGI GEKSLDKVKVPCEWVGRV LTR  | 50  |
| <i>P. acnes</i>                 | SITRLRDL LLLADIPAS-RLVIACDT IGGIGPRPDDSYPADPVWCAHLGAR  | 61  |
| <i>S. thermophilum</i>          | --MRWRDLTLVDLP CGGRLVIACDAAGGI GPKERD VIRVAGYVIGRFTAR  | 48  |
| <i>T. brockii</i>               | MIERYRDLVVIYEN-DVAYVIS CDISLGAIGNKEHDV LKVDEEIVGRTTVK  | 49  |
| <i>T. ethanolicus</i>           | MIERYRDLVVIYEN-DVAYVIS CDISLGAIGNKEHDV LKVDEEIVGRTTVK  | 49  |
| <i>T. italicus</i>              | MIERYRDLVVIYEN-DVAYVIS CDISLGAIGNKENDV LKVDEEIVGRTTVK  | 49  |
| <i>T. mathranii</i>             | MIERYRDLVVIYEN-DVAYVIS CDISLGAIGNKENDV LKVDEEIVGRTTVK  | 49  |
| <i>T. pseudethanolicus</i>      | MIERYRDLVVIYEN-DVAYVIS CDISLGAIGNKEHDV LKVDEEIVGRTTVK  | 49  |
| <i>T. tengcongensis</i>         | MIERYRDLVVIYEK-DVAFVVS CDISVGAIGSKENDI LKVDEEIVGRTTVK  | 49  |
| <i>T. thermosaccharolyticum</i> | MVERYRDLVVIYES-DTVYAIACD SIGAIGNKEGD I LKVDEEIVGRTTVK  | 49  |
| <i>A. metaliredigens</i>        | VSLMEVMSV GARVMTVINTLSVEREPTGEKMIKGIQKMIEEVKLP----     | 96  |
| <i>A. oremlandii</i>            | VALMELLATGATPLTVVNTLGVEMEDSGVRIIEGIQKALEPLNLK---ED     | 96  |
| <i>A. colihominis</i>           | VPLMEVLATGAAPIVIADNLCVEMEPGRRIIAAMQEELRGCGLYD----      | 146 |
| <i>A. flavithermus</i>          | VAWMELMSIGATPKAFVLQNFVN-DDAWHALVAGVQQTMEELQLSLP---     | 92  |
| <i>B. halodurans</i>            | VALLECMSVGATPFTFLVQNFSG-DEPYQKMDGINRALGEANQAQAT--      | 77  |
| <i>C. hydrogenoformans</i>      | VVLMELLAVKARQVIVSCTVSCWEPTGKEIYQGVLAEVKTL PFA-----     | 95  |
| <i>C. botulinum</i>             | VGILEVMCTGAEIVTNTALCCEMNP TGREIIDGKIGELKRAGID----      | 96  |
| <i>C. perfringens</i>           | VCLFELLAFRAKPLVIVNNLGM SMNNGEKKIIQGINRAIKEYNAENFFEE    | 100 |

|                                 |                                                      |     |
|---------------------------------|------------------------------------------------------|-----|
| <i>C. sporogenes</i>            | VGILEVMCTGAEIVTVTNAVCCMNPTGKEIIDGKIGELKCRAGID-----   | 108 |
| <i>C. tetani</i>                | VALMEVLCTGAEIVTITDAVCNEMPTGKEIIRGIKEELKEAKIN-----    | 96  |
| <i>D. hafniense</i>             | VALLEVLAVGAVPQMLSAIANEFLPAGEEIMKGVREELKAMNLL-----    | 95  |
| <i>G. kaustophilus</i>          | VALMELLVSGAEARVVVLQNFIA-DDRWEALCRGVRRRCRELGDLP----   | 92  |
| <i>G. thermodenitrificans</i>   | VALMELVSVGAEKAVVLQNFIA-DERWEALCRGIRQAGSELGLDLP---    | 92  |
| <i>H. modesticaldum</i>         | VALMEILATGAEFPVALTVTVANEPFPTGGEVIAGVRDELATIGKR-----  | 95  |
| <i>L. gravesensis</i>           | VPLMELLCFGATPISVVDTVGNEMPTPTGENMIAGLKQELKRAGLS-----  | 93  |
| <i>L. buchneri</i>              | VPLMELLCFGATPISVVDTVGNEMPTPTGENMIAGLKQELKRAGLS-----  | 93  |
| <i>L. hilgardii</i>             | VPLMELLCFGATPISVVDTVGNEMPTPTGENMIAGLKQELRRGGLS-----  | 93  |
| <i>L. innocua</i>               | VALLEMLASGAVVAVSDVIGAEMEPTGKRVIAGLKDELFKADLG-----    | 93  |
| <i>L. monocytogenes</i>         | VALIEMIASGAEVAVSDVVGEMEPTGRRVIVGLKDELTKANLS-----     | 93  |
| <i>L. welshimeri</i>            | VALLEMIASGADVVSVDVGAEMEPTGRRIIIGLKEELSKANLN-----     | 93  |
| <i>L. sphaericus</i>            | VTFLQALAAQALPIQILLANFSG-DAAWSRYERGIQQVFEETGLPCPV--   | 84  |
| <i>M. thermoacetica</i>         | VALMEVLALGAWPVCVNTLCVEPEPAGAAIREGVADEMRVLGIDPEK--    | 104 |
| <i>N. thermophilus</i>          | VAVMELLALRIDPFLVINTLANEMVPTGEQIIISGIKEELDTVEIDP----  | 96  |
| <i>P. acnes</i>                 | VPLLEVLFCAGARPLVLDLTCQDSASAQPMIAE-FRRCALDAGIDPD----  | 107 |
| <i>S. thermophilum</i>          | VALMDLLAAGAQLPHLVNNTCEVPDPTGREILQIGICDEAALAGLSAD---  | 95  |
| <i>T. brockii</i>               | VALSEVLCVGAKPLVISDTLSVEMNPTGQKILRGIKSELEENGLS-----   | 94  |
| <i>T. ethanolicus</i>           | VALSEVLCVGAKPLVISDTLSVEMNPTGQKILRGIKSELEENGLS-----   | 94  |
| <i>T. italicus</i>              | VALSEVLCVGAKPLVISDTLSVEMNPTGKILKGIKNELEDNGLL-----    | 94  |
| <i>T. mathranii</i>             | VALSEVLCVGAKPLVISDTLSVEMNPTGKILKGIKNELEDNGLL-----    | 94  |
| <i>T. pseudethanolicus</i>      | VALSEVLCVGAKPLVISDTLSVEMNPTGQKILRGIKSELEENGLS-----   | 94  |
| <i>T. tengcongensis</i>         | VALSELLSVGATPLVSDTLSEMYPTGKILKGIKKELEENGL-----       | 93  |
| <i>T. thermosaccharolyticum</i> | VAVSELLCIGAWPIIISDTLSNEMNPTGIKIIGGIKKELENDNEIY-----  | 94  |
|                                 |                                                      |     |
| <i>A. metaliredigens</i>        | ----ITALNGSTEEENVVTCQTAMGITVIGEVERESIKIGCSK-----     | 134 |
| <i>A. oremlandii</i>            | ----IVVTGSTEENIPVSQTSMGITIIIGMMEKSRWRAQKVE-----      | 133 |
| <i>A. colihominis</i>           | ----AVSFTGSTEDNMRTLQGTIGVTVIGLVSGASLRRLGRTO-----     | 184 |
| <i>A. flavithermus</i>          | -----ITGSSSENMPMQSAVGFVAVGTVRKTEKRINVTP-----         | 127 |
| <i>B. halodurans</i>            | -----IAGSTSENMVLEQSCLGVTVIGRVHQSALKIGITP-----        | 112 |
| <i>C. hydrogenoformans</i>      | -----IDITGSSSEKNFTTNTTGAGFTAVGLGDELLVNRICET-----     | 132 |
| <i>C. botulinum</i>             | ----EVLVTGSTEENFPFSFSTGLGITVIGVIVDNSVIKVNNSVNNFGNNEK | 142 |
| <i>C. perfringens</i>           | KSNLSECVTGSTEDDNFKTLQTFGLGTTIIGEKEET--LKVNF-----     | 140 |
| <i>C. sporogenes</i>            | ----EVLVTGSTEENFTTFTSTGVGIVTGLMVDNSVIKVNNSVNNFGNNEK  | 154 |
| <i>C. tetani</i>                | ----EVLVTGSTEENFPFKATGLGVTVIGVIVDNNMKNVNNIT-----     | 134 |
| <i>D. hafniense</i>             | ----SLPAAVSTENKMPTEQTLGITVIGLQDQDKLRIGRAR-----       | 133 |
| <i>G. kaustophilus</i>          | -----ITGSTEENFPVQSAVGVAIGTVANERKRIGITP-----          | 127 |
| <i>G. thermodenitrificans</i>   | -----ITGSTEENFATVQSAVGVAIGTVAHGQKRIGITP-----         | 127 |
| <i>H. modesticaldum</i>         | ----DLPLAISTEENKPIPTRQTGVTITLVGAVEKERLRVGCSSR-----   | 133 |
| <i>L. gravesensis</i>           | ----DISLNGSTEDNMPTRTTSIGVTVIGIATRVDLDFQ-K-----       | 130 |
| <i>L. buchneri</i>              | ----DISLNGSTEDNMPQTTSIGVTVIGIATRVDLDFQ-K-----        | 130 |
| <i>L. hilgardii</i>             | ----DISLNGSTEDNMPQTTSIGVTVIGIATRVDLDFQ-K-----        | 130 |
| <i>L. innocua</i>               | ----HIELNGSTEEENMNVTQTSVGVVLTGFATKAALKLINVH-----     | 131 |
| <i>L. monocytogenes</i>         | ----HIELNGSTEEENMKVTQTSVGVVLTGFATKAALKLINVH-----     | 131 |
| <i>L. welshimeri</i>            | ----HIELNGSTEEENMKVTQTSVGVVLTGFATKAALKLINVH-----     | 131 |
| <i>L. sphaericus</i>            | -----IAGSSSENMPQLQSLAITMLGEIQQ--RKAWDL-----          | 116 |
| <i>M. thermoacetica</i>         | -----TLTGSSSEKNIPTTQSGIGITVIGLATTAEELMGRLA-----      | 140 |
| <i>N. thermophilus</i>          | ----EISLTGSCETNIVTDQGTAGVTVLQGS-PEFPGWGYSY-----      | 133 |
| <i>P. acnes</i>                 | ----AVTGSTEDNVATQGTGVGVTIIGVMHHEDEVPK--SL-----       | 141 |
| <i>S. thermophilum</i>          | -----QINGSTSEKNIPTVQTLGVTVAIGYLAPGRSLR-TAR-----      | 130 |
| <i>T. brockii</i>               | ----DVVFTGSTEENFPSTITGIGITVIAKANVCDLKIKKVK-----      | 132 |
| <i>T. ethanolicus</i>           | ----DVVFTGSTEENFPSTITGIGITVIAKANVCDLKIKKVK-----      | 132 |
| <i>T. italicus</i>              | ----DVVFTGSTEENFPSTITGIGITVIAKAYVCDLKIKKVK-----      | 132 |
| <i>T. mathranii</i>             | ----DVVFTGSTEENFPSTITGIGITVIAKANVCDLKIKKVK-----      | 132 |
| <i>T. pseudethanolicus</i>      | ----DVVFTGSTEENFPSTITGIGITVIAKANVCDLKIKKVK-----      | 132 |
| <i>T. tengcongensis</i>         | ----EVLVTGSTEENFPSTITGIGITAVGRARKEDLKIKKAR-----      | 131 |
| <i>T. thermosaccharolyticum</i> | ----DVALTGSTEENFPSTMTGVTVAIGKAEKALKVRKAM-----        | 132 |
|                                 |                                                      |     |
| <i>A. metaliredigens</i>        | -----PGDLIVALGTEPKVGNIEK--LPI-DDEICSIKDFQALVKMKNVK   | 175 |
| <i>A. oremlandii</i>            | -----KGDVALVVGIPKVGQEVLEDEGR--EIMSIPLLLELLKKSIIH     | 174 |
| <i>A. colihominis</i>           | -----RGDAVYCAQVPSQSVGLERYSEHDP--SVAKISTVTRLCALDYIH   | 226 |
| <i>A. flavithermus</i>          | -----TDACWAVIGEPVGEAVIQKKDR---IIPLSLFRLLQLDGIY       | 167 |
| <i>B. halodurans</i>            | -----KDAGIALLGKPLVGEVVSQEKD---VFPLKQFDELLEQEEGVY     | 152 |
| <i>C. hydrogenoformans</i>      | -----SDLYIVGVPVGEVVKFPPELQ---ATPHLVYELSQNNDVL        | 170 |
| <i>C. botulinum</i>             | HNK---DDILLISVGIKPVGEEIN--IYD-DKEIVDYEDIKILLENPKVY   | 186 |
| <i>C. perfringens</i>           | -----KGDSICLLGIPKVGQEVLEDINNNLGEIVTFKDFKILMDNKDVK    | 184 |
| <i>C. sporogenes</i>            | HNKFDLDDVLLISVGIKPLGKEIN--IYD-DKEIVDYVDIKILLENPRVY   | 201 |
| <i>C. tetani</i>                | -----KDCLLISIGIPKVGKEID--IFGYDEEIASYNNISTILNNQEAY    | 176 |
| <i>D. hafniense</i>             | -----PGNSLFCGLGPKVGTAEADPEDP--DILQGIHLIQLLNIPGVY     | 174 |
| <i>G. kaustophilus</i>          | -----EEAKFAVIGRPLVGSVAVLSHPPEW---VAPLPLFAALLRTPYIY   | 167 |
| <i>G. thermodenitrificans</i>   | -----ETAKFAVIGRPLVGSVAVLVHSDW---IAPLSLVAELLASPVYVY   | 167 |
| <i>H. modesticaldum</i>         | -----PGDCVYSLGWPVGAEVVVDDGK---AIARADHVQALLAHPGVH     | 174 |
| <i>L. gravesensis</i>           | -----QPMVIYQLGRPLVG--DAVKQHF--DLFSYNLINELRSDSAVI     | 170 |
| <i>L. buchneri</i>              | -----QPMVIYQLGRPLVG--YAVKQHF--DLFSYNLINELRSDSAVI     | 170 |



|                                 |                                                      |     |
|---------------------------------|------------------------------------------------------|-----|
| <i>L. hilgardii</i>             | -----QPMVIYQLGRPLVGV--YAVKQHFN--DLFSYNLINELRSDSAVI   | 170 |
| <i>L. innocua</i>               | -----EAAVLFAFGEPIVGV--AEVLQRM--EMPDYPLVKQLVSDSRVL    | 171 |
| <i>L. monocytogenes</i>         | -----EAAVLFAFGEPIVGV--AEVLQKLR--DMPDYRLVKKLVEHNDVL   | 171 |
| <i>L. welshimeri</i>            | -----EAAVLFAFGEPIVGV--EEVLQKMT--EMPDYHLVKKLVADSSVL   | 171 |
| <i>L. sphaericus</i>            | -----EQLSWYTYGLPLVGEELLAQPDD---VAQLQPIYQAWLAEIVQ     | 156 |
| <i>M. thermoacetica</i>         | -----AGDTLALFGRPKVGV--TEVFLDD--PEIVDLKTVRLLDQPGIR    | 180 |
| <i>N. thermophilus</i>          | -----PGIALYMTGTPKVGAEVDLND-P---EIMDLQTMKELSEINGVL    | 173 |
| <i>P. acnes</i>                 | -----DGDVLCVCGAPISAPNDDVALGR--REIVGVTEVKALMASGVKH    | 183 |
| <i>S. thermophilum</i>          | -----PGDLVVAIGRPKVGV--AEVRLDD--PELPDLPLVRRLAGDPLVH   | 170 |
| <i>T. brockii</i>               | -----AGMHVSLGYPKRVGSEVLGAK-----DVLNLSYDIKISNSKEIV    | 171 |
| <i>T. ethanolicus</i>           | -----TGMHVSILGYPKRVGNEVLSSN-----DVLTLKDYVKISNSKEIV   | 171 |
| <i>T. italicus</i>              | -----AGMHVSLGYPKRVGSEVLSSK-----DVLTLKDYIKISNSKEII    | 171 |
| <i>T. mathranii</i>             | -----AGMHVSLGYPKRVGSEVLNSK-----DVLTLKDYIKISNSKEII    | 171 |
| <i>T. pseudethanolicus</i>      | -----AGMHVSLGYPKRVGSEVLGAK-----DVLNLSYDIKISNSKEIV    | 171 |
| <i>T. tengcongensis</i>         | -----KGMHVVLIGYPKRVGSEVLGAE-----DVMTLKDYIKISQTKEVV   | 170 |
| <i>T. thermosaccharolyticum</i> | -----AGMEVGLFYGYPKRVGQEVLCCH-----DILSLKDYVKIFRCGEIV  | 171 |
|                                 |                                                      |     |
| <i>A. metaliredigens</i>        | DIHPIGSKGMYEBAQLLASLNHCEFKSREA-TGVD--LKKSAGPATAVIF   | 222 |
| <i>A. oremlandii</i>            | DIIIPVGSKGIAYEVGQMAESNGIGYNLY-EHVGID--LNKSAGPATCVIV  | 221 |
| <i>A. colihominis</i>           | EIIPVGSKGAAYEAGQLAECVCGTFAAD-AQPPID--LATSAGSCTAVLV   | 273 |
| <i>A. flavithermus</i>          | EIIPVGSKGISHEBWKLMYGE-----RPLRCS--LP--PHASAGPATCVLV  | 208 |
| <i>B. halodurans</i>            | EIIPVGSKGVKYLEVLAATNEWNTLQVPVNGNVD--LTKSSGPTSLLI     | 200 |
| <i>C. hydrogenoformans</i>      | EIIPVGSKGVGABLMWLNKQG---FEIENVIAPPFS--LEKSAGPGTSLLV  | 216 |
| <i>C. botulinum</i>             | EIVPVGSKGIILYEGEILARNNNLKLKLEEN-ISID--IKKSNCPSTCLIF  | 233 |
| <i>C. perfringens</i>           | DIIPIGSKGIHIEISELENSDKIRINL--SYEGDY--LRKSAGPATALLF   | 230 |
| <i>C. sporogenes</i>            | EIVPVGSKGIILYEGEVLAKNNLKLKLEEN-IPID--IKRSNCPATTVIA   | 248 |
| <i>C. tetani</i>                | EIVPVGSKGIILFAEELAKNNRCEFYLNKDKIDVD--IRRSAGPATVIA    | 224 |
| <i>D. hafniense</i>             | DIIIPVGSQGIIRGEAEALAQAVGARFGE-DSQCRLD--INKSAGSCTAVLV | 221 |
| <i>G. kaustophilus</i>          | ELIPIGSKGIYYEWTQLLAANGRQGRACACP--LP--LFSSGCPATSVLV   | 213 |
| <i>G. thermodenitrificans</i>   | ELIPIGSKGIYYEWTQLLAANGRQWCACACP--LP--LFASGCPATSLLI   | 213 |
| <i>H. modesticaldum</i>         | EIVPVGSKGIIRABAEKLAADVHCRICEWQSVAGLD--LDKSAGPSTCLVF  | 222 |
| <i>L. gravesensis</i>           | DMLPVGSKGIAFIEINQLAKTHQLKVVDGSSVMETEE--MVKSAGPATVALI | 218 |
| <i>L. buchneri</i>              | DMLPVGSKGIAFIEINQLAKTHQLEIVDSSVMETEE--MAKSAGPATVALI  | 218 |
| <i>L. hilgardii</i>             | DMLPVGSKGIAFIEINQLAKTHQLEIVDSSVMETEE--MAKSAGPATVALI  | 218 |
| <i>L. innocua</i>               | EIVPVGSKGMAYEANTLARLNDVCFEASGVFNAT--MNKTAGPASVILV    | 219 |
| <i>L. monocytogenes</i>         | EIVPVGSKGMAYEANTLARLNGGIFVPSDTFSEAV--MNKTAGPASVILA   | 219 |
| <i>L. welshimeri</i>            | EIVPVGSKGIILYEGEINLAKLNNRVFKETSSLDEIS--LNKTAGPASVIL  | 219 |
| <i>L. sphaericus</i>            | QVWVPGSKGLQGEICARLFGQ-----QLVECS--HD--MTKSAGPSTVILL  | 197 |
| <i>M. thermoacetica</i>         | EIVPAGSRGILABARDLAALYGLQINWRPGLTGPA--LLKSAGPATCILA   | 228 |
| <i>N. thermophilus</i>          | EIIPVGSQGLLKESENTLANRSELRLQLNNAIKTDEGLLTKSAGPSTCVIF  | 223 |
| <i>P. acnes</i>                 | DCVPVGSKGVAVAEALQASTAGLRVAFQP--TDVD--LTRSGCPSTCLVM   | 229 |
| <i>S. thermophilum</i>          | DLLPVGSRGIRABAEEDLAASAGLEVEWAPAEAGFP--LGKSAGPVTCLLV  | 218 |
| <i>T. brockii</i>               | EAIIPVGSKGVKYLEGILEKISGLKVEA-NFPQHLD--VLKSGCPSTCCLV  | 218 |
| <i>T. ethanolicus</i>           | EAIIPVGSKGVKYLEGILEKISGLKVEA-NFPQHLD--VLKSGCPSTCCLV  | 218 |
| <i>T. italicus</i>              | EAIIPVGSKGIKYEGILEKISGLKVEA-NFPQYLD--VLKSGCPSTCCLV   | 218 |
| <i>T. mathranii</i>             | EAIIPVGSKGIKYEGILEKISGLKVEA-NFPQYLD--VLKSGCPSTCCLV   | 218 |
| <i>T. pseudethanolicus</i>      | EAIIPVGSKGVKYLEGILEKISGLKVEA-NFPQHLD--VLKSGCPSTCCLV  | 218 |
| <i>T. tengcongensis</i>         | EAIIPVGSKGIAYELGVLEDLYGFRIKE-DDGLNID--LFKSAGPATCCLV  | 217 |
| <i>T. thermosaccharolyticum</i> | EAIIPVGSKGIKHELDVLLKSSGLEFLK-EYKSLD--DTKSGCPSTCCLV   | 218 |
|                                 |                                                      |     |
| <i>A. metaliredigens</i>        | SVSKE-QLPT--VESQLQQQVKVIGSLEN-----                   | 248 |
| <i>A. oremlandii</i>            | AVNQE-NYEA--LKESMPIPVHVLVGSFT-----                   | 246 |
| <i>A. colihominis</i>           | SLPLQ---AGGRLAADMDVPCFLIGRIQ---                      | 298 |
| <i>A. flavithermus</i>          | SYHQK---QEPLQLSLAGTLFYPIVNEL---                      | 233 |
| <i>B. halodurans</i>            | TFDGT---MEALKAKYSSWTTTLASKIST-----                   | 227 |
| <i>C. hydrogenoformans</i>      | AVKEG-----IELKAAIPVHYLGKAIKVKKT-----                 | 242 |
| <i>C. botulinum</i>             | AIHKE-EYEN--IRAKINN-VNIIGKLER-----                   | 258 |
| <i>C. perfringens</i>           | ILRNN-SLED--IKNKIKTPIMEIGNII-----                    | 255 |
| <i>C. sporogenes</i>            | AIHKE-EYEN--IRAKINN-VNIIGELESV-----                  | 274 |
| <i>C. tetani</i>                | AVSKK-AYEN--LKD-IQN-INLLGEIKKGT-----                 | 250 |
| <i>D. hafniense</i>             | TAED-----IELGDFGKLPiHKIGRLEEDGGGGLLTENED             | 257 |
| <i>G. kaustophilus</i>          | SYDPD---GEREIKKQAGSLFFPLHVEW-----                    | 238 |
| <i>G. thermodenitrificans</i>   | SYDPA---GEQVLRKQAGRLFFSLFAEL-----                    | 238 |
| <i>H. modesticaldum</i>         | TAGP-----KPPEIAGAPIHYLGRLESAG-----                   | 247 |
| <i>L. gravesensis</i>           | GVKPE---KRRVFERHFQVSYLSMLT-----                      | 242 |
| <i>L. buchneri</i>              | GVKPE---KRRVFERHFQAHYLLSLN-----                      | 242 |
| <i>L. hilgardii</i>             | GVKPE---KRRVFERHFQAHYLLSLN-----                      | 242 |
| <i>L. innocua</i>               | AVKAS---EVKAFEQNPPAAKCLGELRNYHG-----                 | 247 |
| <i>L. monocytogenes</i>         | AVKED---NVTAFEREFGLGAKRIGLLRGNEEW-----               | 249 |
| <i>L. welshimeri</i>            | AVKKR---DCSIFEKHFSGAQYLGELCGNEEQI-----               | 249 |
| <i>L. sphaericus</i>            | GMDPE---KEQLAHQFFQRNFEKLRISAE-----                   | 223 |
| <i>M. thermoacetica</i>         | AGDRA-ALETTGRR--EKPFCLLGTLGPAASR-----                | 258 |
| <i>N. thermophilus</i>          | TADHDGADQAQKLAQVSGKMKMTQLGRLY-----                   | 251 |
| <i>P. acnes</i>                 | ACAKT-NLEQLHALVNPERPVAWIGHLRS-----                   | 257 |

|                                 |                                      |     |
|---------------------------------|--------------------------------------|-----|
| <i>S. thermophilum</i>          | AAAPS-ALQGLALTL--TQPWAVVAQLR-----    | 243 |
| <i>T. brockii</i>               | VHNEE---DTVSIKGLTDKPLTYVGVLI-----    | 243 |
| <i>T. ethanolicus</i>           | VHSEE---DTASIKGLTDKPLTYVGVLI-----    | 243 |
| <i>T. italicus</i>              | VHNEE---DTVSIKGLTDKPLTYIGVLI-----    | 243 |
| <i>T. mathranii</i>             | VHSEE---DTVSIKGLTDKPLTYIGVLI-----    | 243 |
| <i>T. pseudethanolicus</i>      | VHNEE---DTVSIKGLTDKPLTYVGVLI-----    | 243 |
| <i>T. tengcongensis</i>         | VYREE---DTDFIKAITDKPFTHVGIIE-----    | 242 |
| <i>T. thermosaccharolyticum</i> | VYKEG---DRRKIENLLDKPFVRLGRLIDGR----- | 246 |

**Figure S6. Alignment of CbIS homologs.** ClustalW2 (Larkin *et al.*, 2007) alignment of predicted CbIS proteins from 32 bacterial species (Table S5). Conserved residues are shaded.

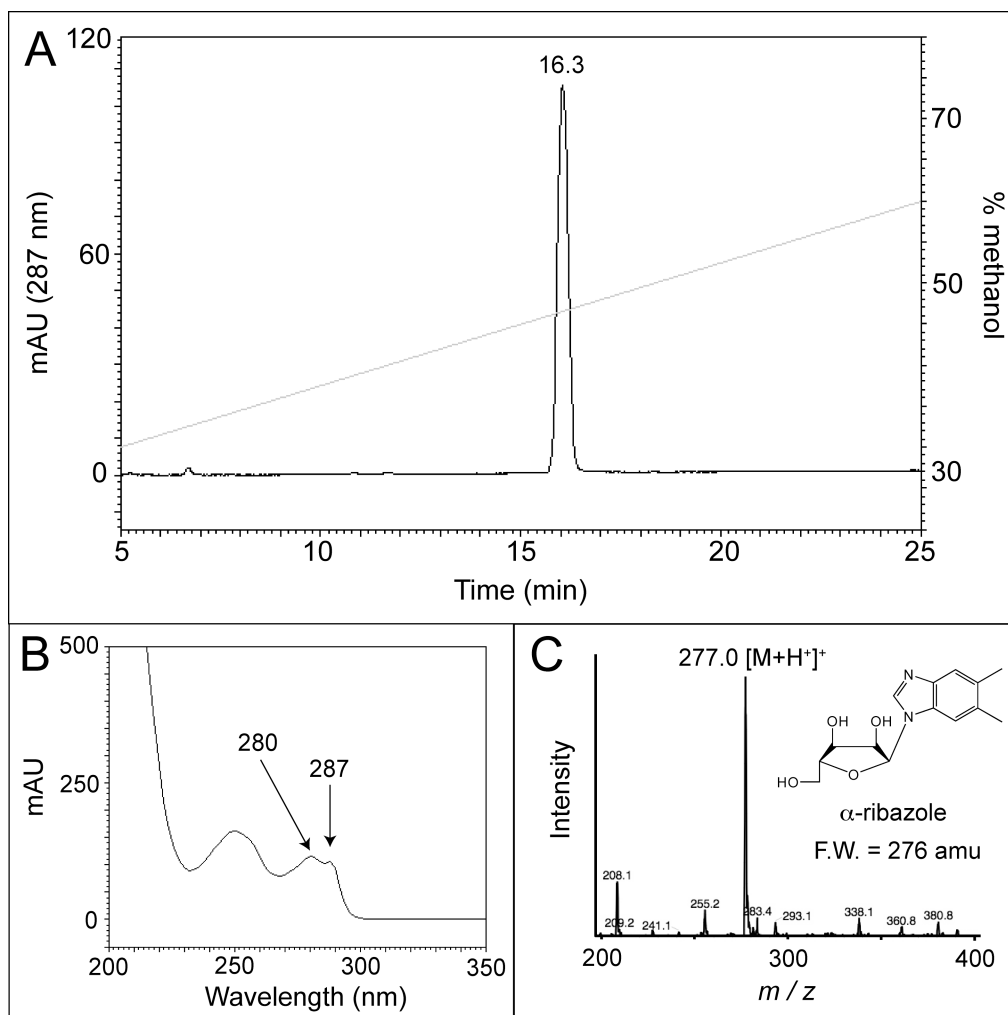

**Figure S7. Purification of  $\alpha$ -R.** Purified  $\alpha$ -R was resolved by RP-HPLC using a Beckman Coulter System Gold® 126 HPLC system equipped with a Phenomenex 150 x 4.6 mm Synergi 4 $\mu$  Hydro-RP column. Products were detected by their absorbance at 287 nm using a photodiode array detector. The column was equilibrated at 1 ml min<sup>-1</sup> with 30% methanol. 5 minutes after injection, the column was developed for 20 min with a linear gradient to 60% methanol, then developed for 5 min with a linear gradient to 100% methanol. Panel A shows elution of a product at 16 min. The grey line (right axis) indicates the methanol gradient used to elute  $\alpha$ -R. Panels B and C show the UV-visible absorbance and mass spectra of  $\alpha$ -R, respectively. The structure of  $\alpha$ -R is indicated in the inset to panel C.

## REFERENCES

- Claros, M. G. & G. von Heijne, (1994) TopPred II: an improved software for membrane protein structure predictions. *Comput. Appl. Biosci.* **10**: 685-686.
- Gray, M. J. & J. C. Escalante-Semerena, (2007) Single-enzyme conversion of FMNH<sub>2</sub> to 5,6-dimethylbenzimidazole, the lower ligand of B<sub>12</sub>. *Proc. Natl. Acad. Sci. U S A* **104**: 2921-2926.
- Gray, M. J., N. K. Tavares & J. C. Escalante-Semerena, (2008) The genome of *Rhodobacter sphaeroides* strain 2.4.1 encodes functional cobinamide salvaging systems of archaeal and bacterial origins. *Mol. Microbiol.* **70**: 824-836.
- Guzman, L. M., D. Belin, M. J. Carson & J. Beckwith, (1995) Tight regulation, modulation, and high-level expression by vectors containing the arabinose P<sub>BAD</sub> promoter. *J. Bacteriol.* **177**: 4121-4130.
- Laemmli, U. K., (1970) Cleavage of structural proteins during the assembly of the head of bacteriophage T4. *Nature* **227**: 680-685.
- Larkin, M. A., G. Blackshields, N. P. Brown, R. Chenna, P. A. McGettigan, H. McWilliam, F. Valentin, I. M. Wallace, A. Wilm, R. Lopez, J. D. Thompson, T. J. Gibson & D. G. Higgins, (2007) Clustal W and Clustal X version 2.0. *Bioinformatics* **23**: 2947-2948.
- Markowitz, V. M., F. Korzeniewski, K. Palaniappan, E. Szeto, G. Werner, A. Padki, X. Zhao, I. Dubchak, P. Hugenholtz, I. Anderson, A. Lykidis, K. Mavromatis, N. Ivanova & N. C. Kyrpides, (2006) The integrated microbial genomes (IMG) system. *Nucleic Acids Res.* **34**: D344-348.
- McGinnis, S. & T. L. Madden, (2004) BLAST: at the core of a powerful and diverse set of sequence analysis tools. *Nucleic Acids Res.* **32**: W20-25.
- Raleigh, E. A., K. Lech & R. Brent, (1989) Selected topics from classical bacterial genetics. In: Current Protocols in Molecular Biology. F. A. Ausubel, R. Brent, R. E. Kingston, D. D. Moore, J. G. Seidman, J. A. Smith & K. Struhl (eds). New York: Wiley Interscience, pp. 1.4.
- Rocco, C. J., K. L. Dennison, V. A. Klenchin, I. Rayment & J. C. Escalante-Semerena, (2008) Construction and use of new cloning vectors for the rapid isolation of recombinant proteins from *Escherichia coli*. *Plasmid* **59**: 231-237.
- Sasse, J., (1991) Detection of proteins. In: Current Protocols in Molecular Biology. F. A. Ausubel, R. Brent, R. E. Kingston, D. D. Moore, J. G. Seidman, J. A. Smith & K. Struhl (eds). New York: Wiley Interscience, pp. 10.16.11-10.16.18.
- Trzebiatowski, J. R., G. A. O'Toole & J. C. Escalante-Semerena, (1994) The *cobT* gene of *Salmonella typhimurium* encodes the NaMN: 5,6-dimethylbenzimidazole phosphoribosyltransferase responsible for the synthesis of N<sup>1</sup>-(5-phospho- $\alpha$ -D-ribose)-5,6-dimethylbenzimidazole, an intermediate in the synthesis of the nucleotide loop of cobalamin. *J. Bacteriol.* **176**: 3568-3575.
- von Heijne, G., (1992) Membrane protein structure prediction. Hydrophobicity analysis and the positive-inside rule. *J. Mol. Biol.* **225**: 487-494.
- Woodcock, D. M., P. J. Crowther, J. Doherty, S. Jefferson, E. De Cruz, M. Noyer-Weidner, S. S. Smith, M. Z. Michael & M. W. Graham, (1989) Quantitative evaluation of *Escherichia coli* host strains for tolerance to cytosine methylation in plasmid and phage recombinants. *Nucl. Acids Res.* **17**: 3469-3478.
